# Supplementary material for: PqsA Promotes Pyoverdine Production via Biofilm Formation
Source: Pathogens. 2017 Dec 25;7(1):3. doi: 10.3390/pathogens7010003 (PMC5874729; doi:10.3390/pathogens7010003)
Supplement: Supplementary file 1 [file pathogens-07-00003-s001.pdf]

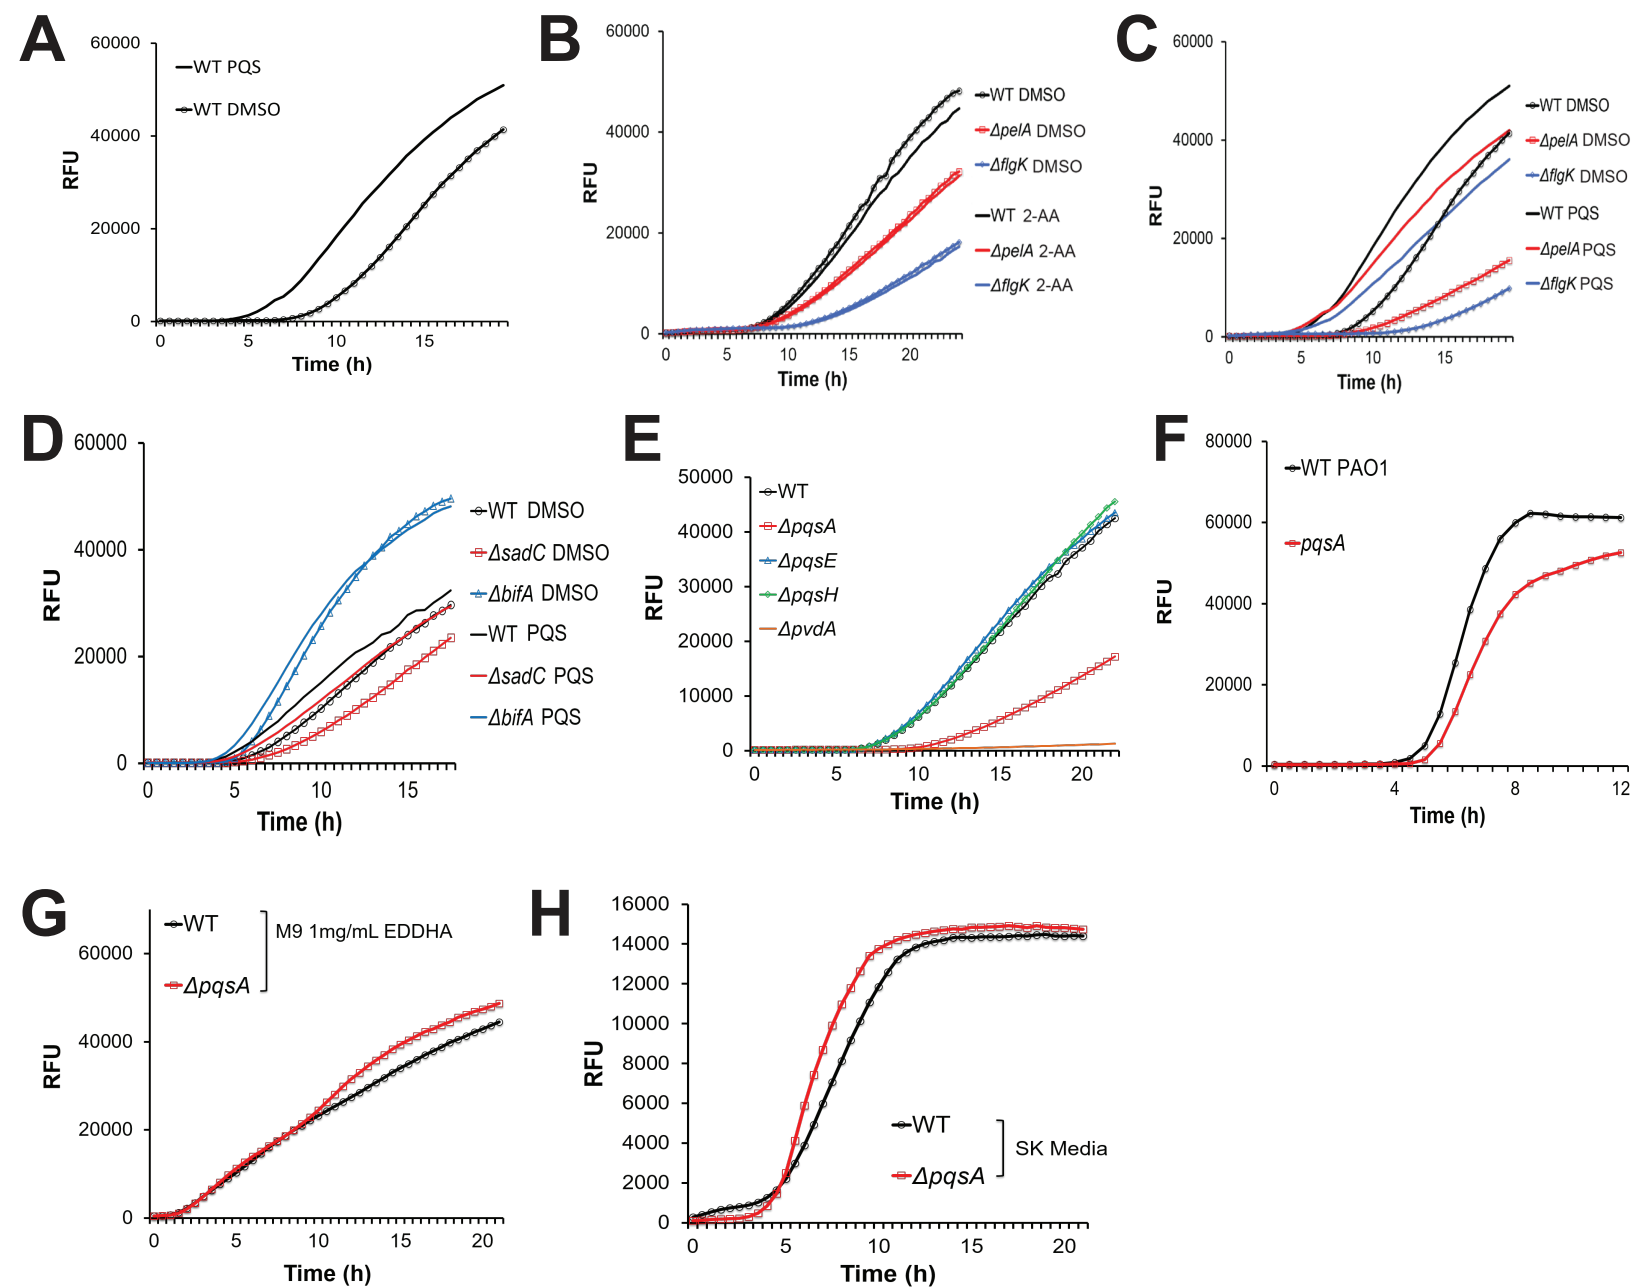

**Figure S1. Pyoverdine production curves without normalization to bacterial growth.** (A) corresponds to **Figure 1B**. (B) corresponds to **Figure S2C**. (C) corresponds to **Figure 2B**. (D) corresponds to **Figure 2E**. (E) corresponds to **Figure 3A**. (F) corresponds to **Figure S3B**. (G) corresponds to **Figure 4B**. (H) corresponds to **Figure 4C**.

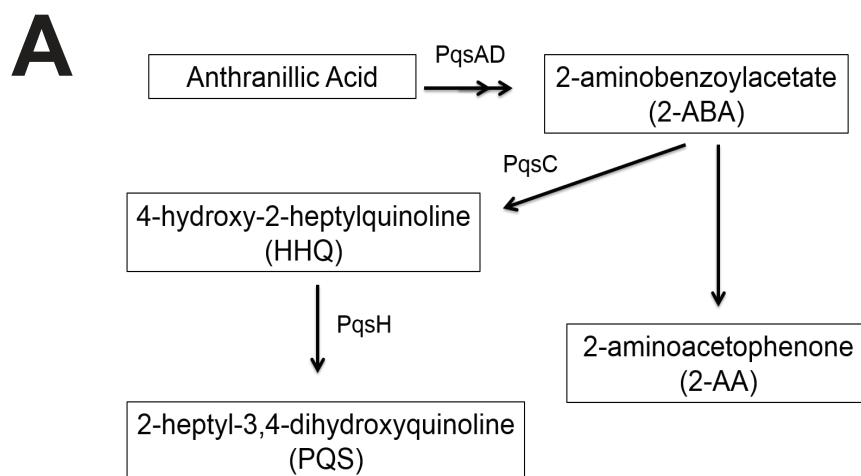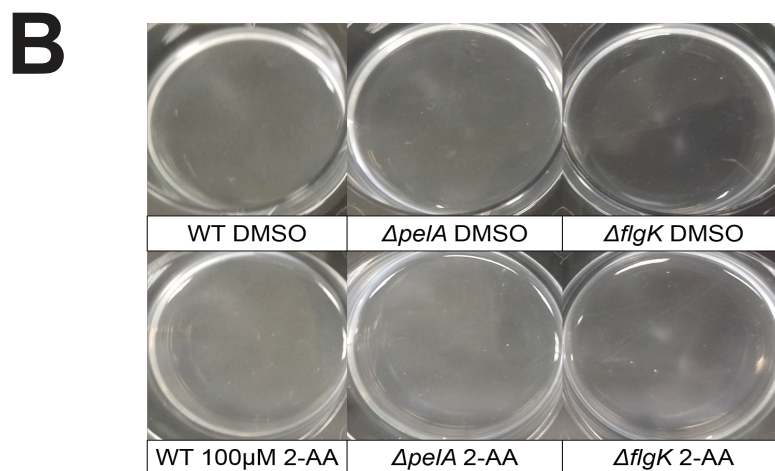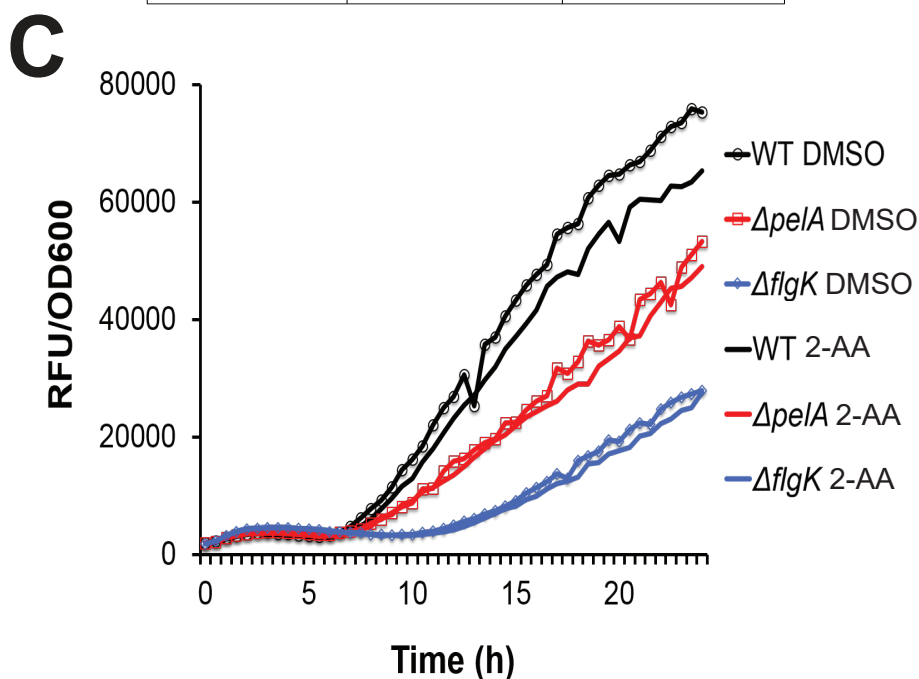

**Figure S2. Exogenous 2-AA does not promote pyoverdine production.** (A) A scheme of PQS and 2-AA biosynthetic pathway [39]. (B) The absence of cell aggregate formation in WT PA14 and biofilm mutants treated with 100 $\mu$ M 2-AA after 4 h growth. (C) Pyoverdine production normalized to bacterial growth in biofilm mutants treated with 100 $\mu$ M 2-AA measured over 24 h. Pyoverdine production curves without normalization to bacterial growth are available in **Figure S1**.

**A**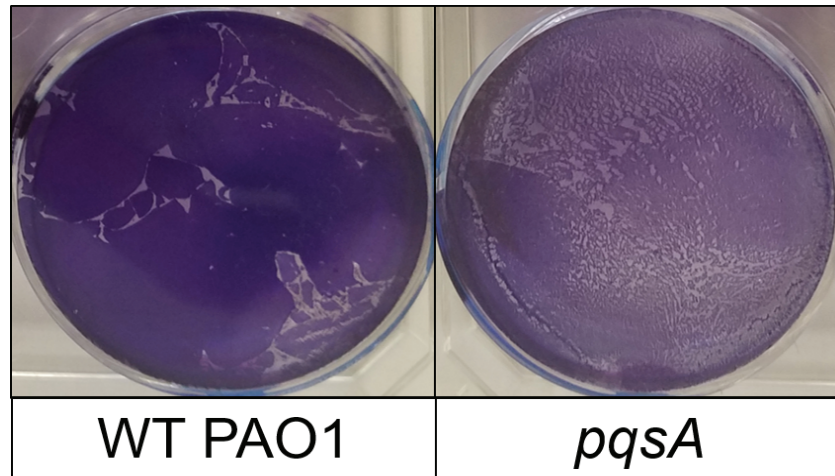**B**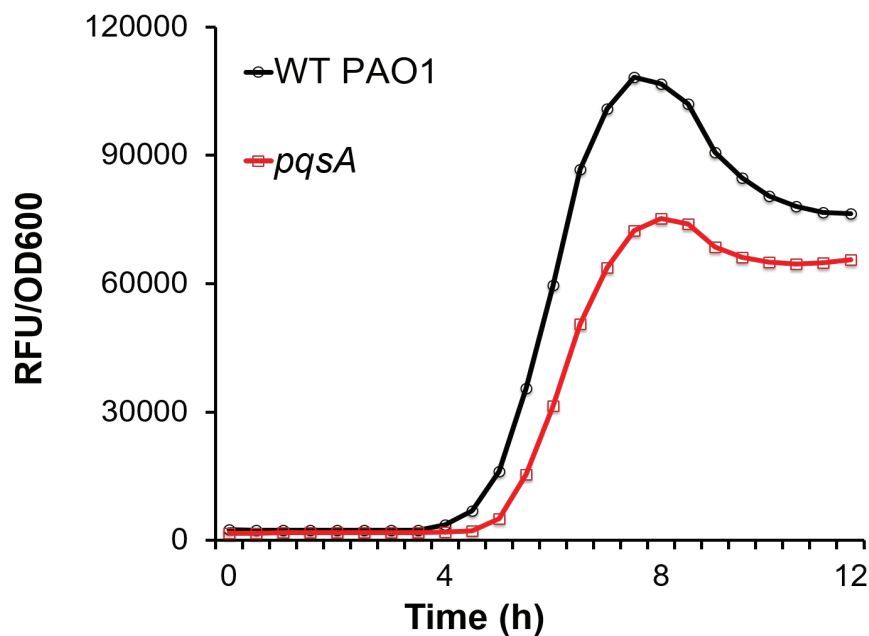

**Figure S3. Disruption of PQS biosynthesis in *P. aeruginosa* PAO1 significantly attenuates biofilm formation and pyoverdine production.** (A) Biofilm matrix of WT PAO1 and a PAO1*pqsA* transposon mutant in 6-well plate stained with 0.1% crystal violet. (B) Pyoverdine fluorescence normalized to bacterial growth measured kinetically over 24 h. Pyoverdine production curves without normalization to bacterial growth are available in **Figure S1**.

**Table S1.** Raw data for **Figure 5**

| Isolates | Biofilm (OD550) | Pyoverdine (RFU) | Growth (OD600) |
|----------|-----------------|------------------|----------------|
| CF27     | 0.224           | 1840             | 1.201          |
| PA14     | 0.484           | 21521            | 1              |
| X13273   | 0.538           | 43720            | 1.55           |
| X25409   | 0.646           | 40487            | 1.531          |
| PAK      | 0.691           | 39651            | 1.564          |
| U2504    | 0.877           | 50028            | 1.398          |
| PAO1     | 0.915           | 42899            | 1.695          |
| 19660    | 1.039           | 43489            | 1.475          |
| 6077     | 1.048           | 34638            | 0.63           |
| S35004   | 1.054           | 41907            | 1.014          |
| MSH10    | 1.095           | 30622            | 1.706          |
| 62       | 1.111           | 42487            | 1.194          |
| UDL      | 1.135           | 7653             | 1.269          |
| CF127    | 1.263           | 35132            | 0.196          |
| JJ692    | 1.351           | 30415            | 0.676          |
| S54485   | 1.636           | 40989            | 0.594          |
| E2       | 1.673           | 41679            | 1.688          |
| MSH3     | 1.706           | 36249            | 1.701          |
| CF18     | 2.163           | 35860            | 0.197          |
